# Supplementary material for: Synthesis of triphenylphosphine-based microporous organic nanotube framework supported Pd catalysts with excellent catalytic activity
Source: Royal Society of Chemistry journal article supplement (doi:10.1039/c6py01706a), 2016-01-01
Supplement: c6py01706a1.pdf [file c6py01706a1.pdf]

## Supporting Information

# Synthesis of triphenylphosphine-based microporous organic nanotube frameworks supported Pd catalysts with excellent catalytic activity

Yang Xu, Tianqi Wang, Zidong He, Aiqing Zhong, Wei Yu, Buyin Shi and Kun Huang\*

School of Chemistry and Molecular Engineering, East China Normal University, 500 N, Dongchuan Road, Shanghai, 200241, P. R. China.

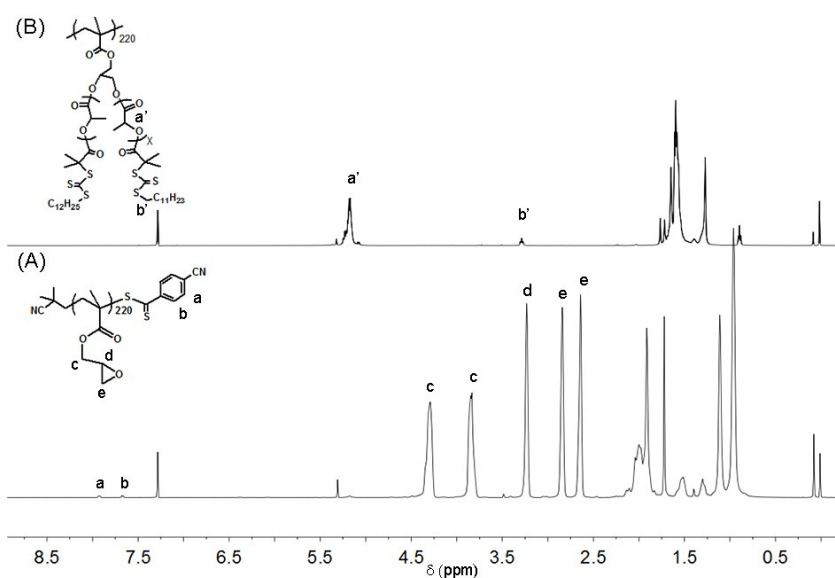

**Figure S1.** <sup>1</sup>H NMR spectra of (A) PGM and (B) poly(GM-g-LA).

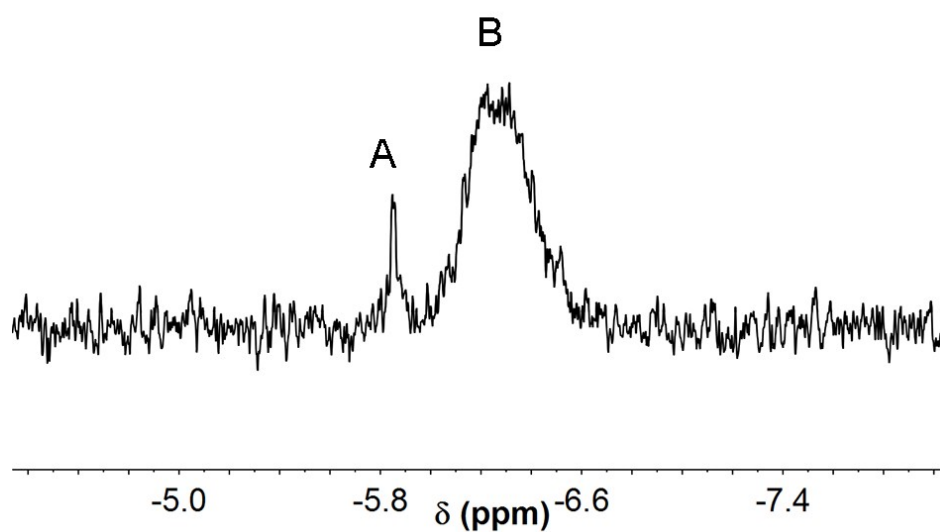

**Figure S2.**  $^{31}\text{P}\{^1\text{H}\}$  NMR spectra of (A) DPPS monomer mixed with (B) copolymer precursors in  $[\text{D}_8]\text{THF}$ .

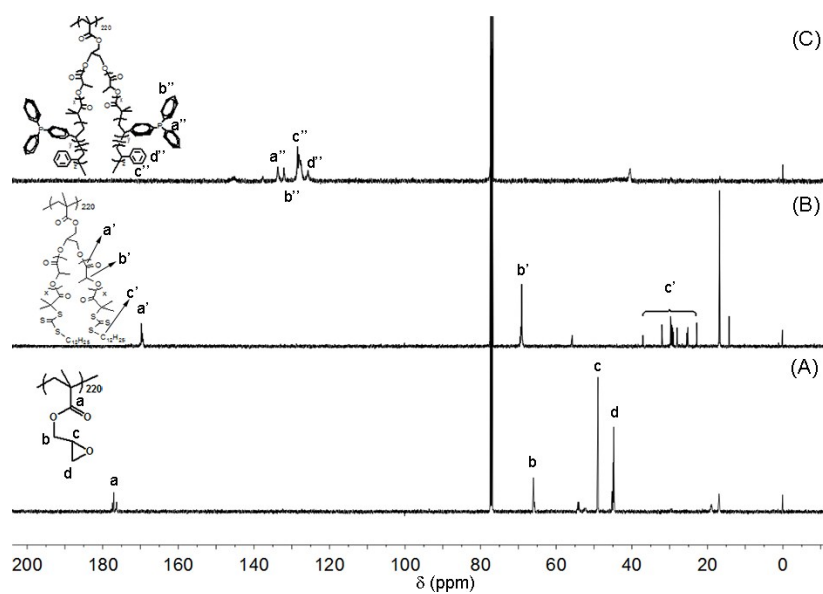

**Figure S3.**  $^{13}\text{C}$  NMR spectra of (A) PGM, (B) poly(GM-g-LA) and (C) poly(GM-g-LA-g-S/DPPS).

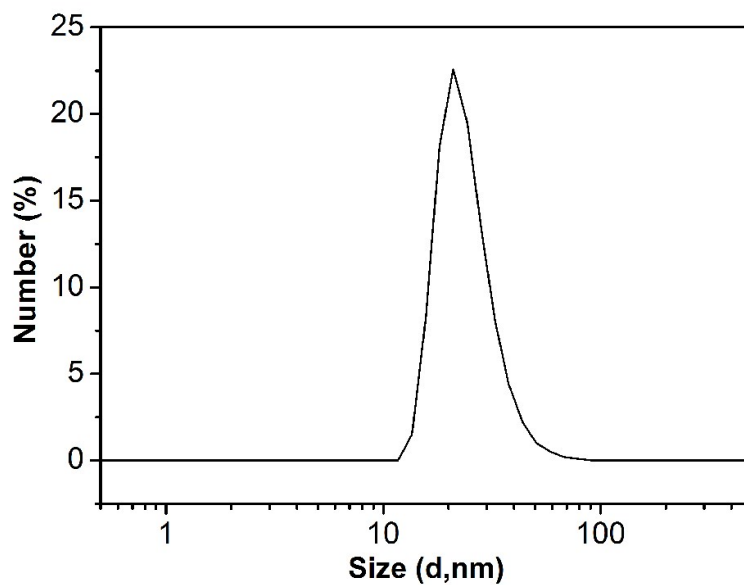

**Figure S4.** DLS analysis of poly(GM-g-LA-g-S/DPPS) bottlebrush polymer precursor in THF. Z-Average = 52 nm. PDI = 0.211.

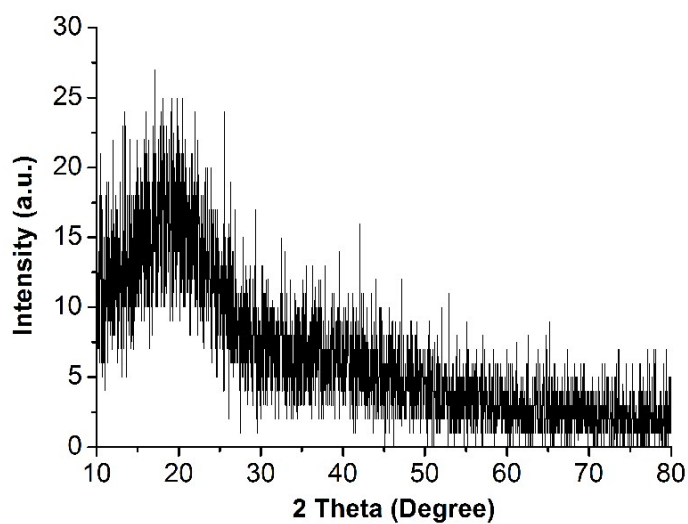

**Figure S5.** XRD pattern of MONFs-PPh<sub>3</sub>@Pd.

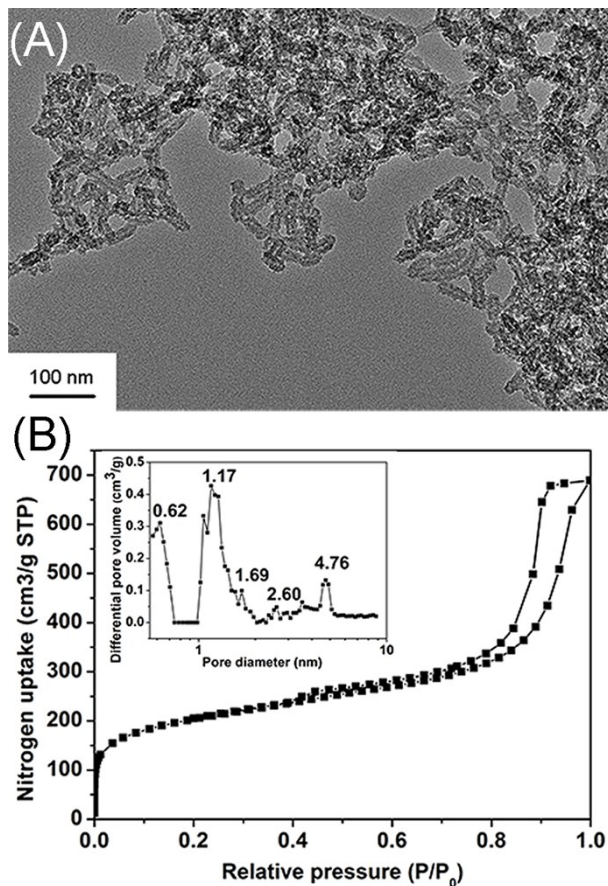

**Figure S6.** (A) TEM image and (B) N<sub>2</sub> sorption isotherm of MONFs-PPh<sub>3</sub>@Pd-2. Pore size distribution was calculated by using the DFT methods provided inset.

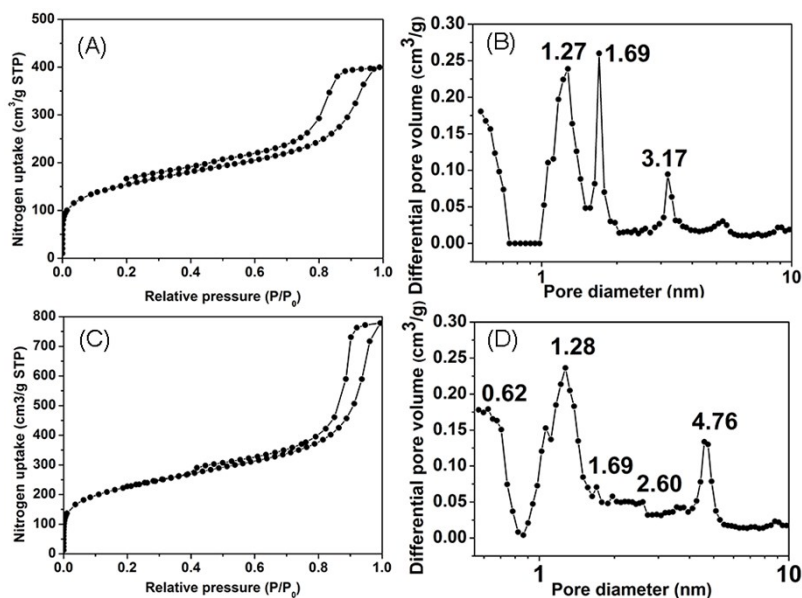

**Figure S7.** Nitrogen adsorption and desorption isotherms of (A) MONFs-PPh<sub>3</sub>-1 and (C) MONFs-PPh<sub>3</sub>-2. Pore size distributions calculated using DFT methods (slit pore

models, differential pore volumes. pore width) of (B) MONFs-PPh<sub>3</sub>-1 and (D) MONFs-PPh<sub>3</sub>-2.

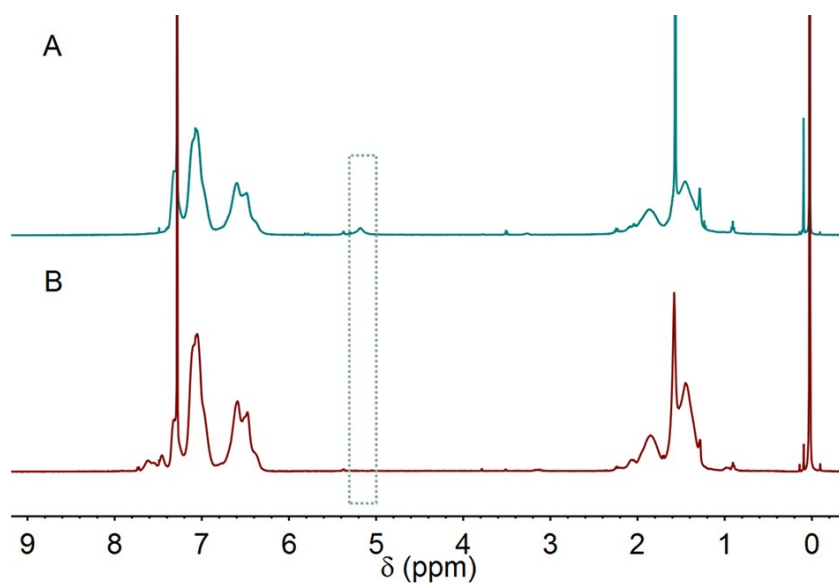

**Figure S8.** <sup>1</sup>H NMR characterization of (A) poly(GM-g-LA-g-S/DPPS) [precursor-1] and (B) S/DPPS block fragment from the precursor-1.

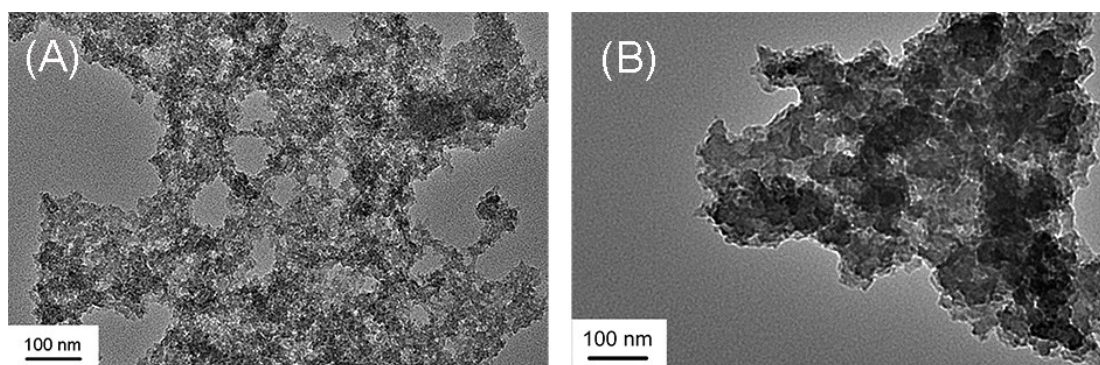

**Figure S9.** TEM images of (A) MOP-PPh<sub>3</sub>@Pd and (B) MOP-PPh<sub>3</sub>@Pd after 1st catalysis cycle.

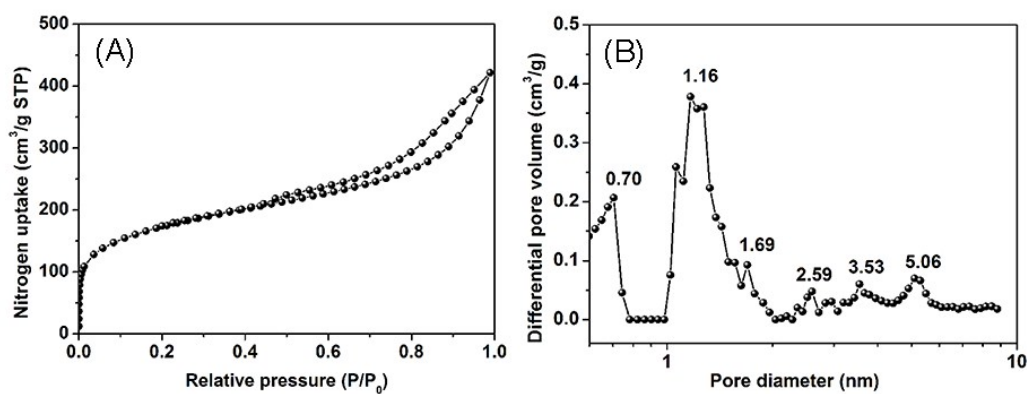

**Figure S10.** (A) Nitrogen adsorption and desorption isotherms; (B) Pore size distribution calculated using DFT methods (slit pore models, differential pore volumes, pore width) of MOP-PPh<sub>3</sub>@Pd.

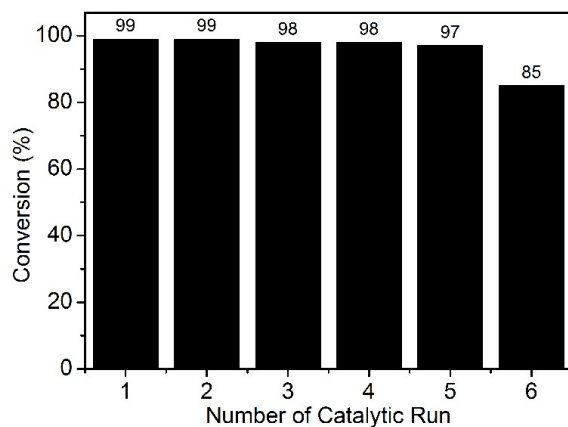

**Figure S11.** Recyclability and reusability of the MONFs-PPh<sub>3</sub>@Pd-1 for the model reaction.

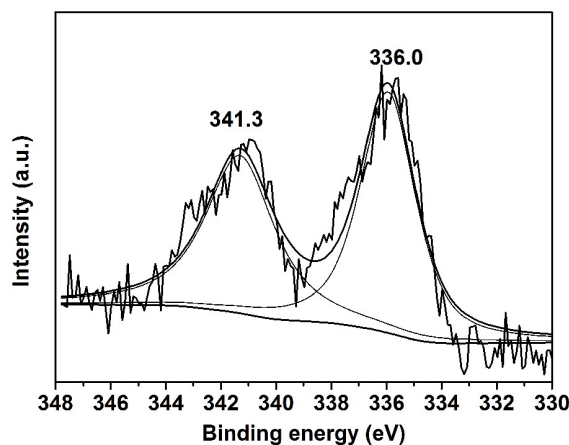

**Figure S12.** XPS spectra of Pd species in MONFs-PPh<sub>3</sub>@Pd-1 after 5 runs.

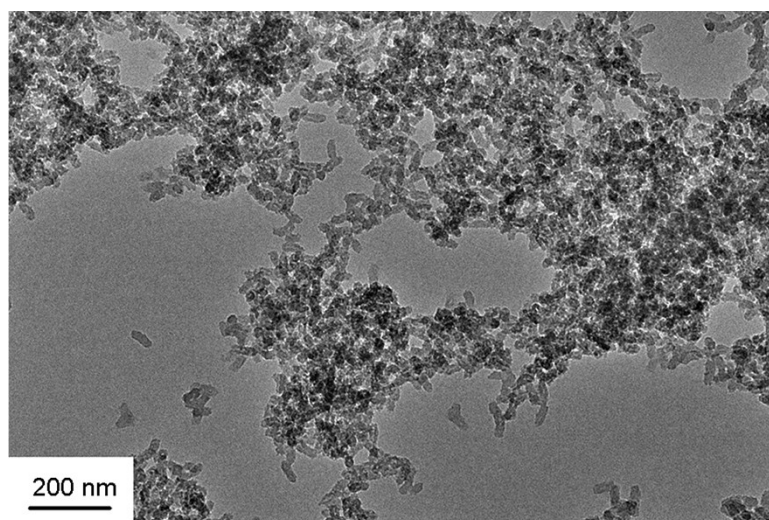

**Figure S13.** TEM image of MONFs-PPh<sub>3</sub>@Pd-1 after 5 runs.

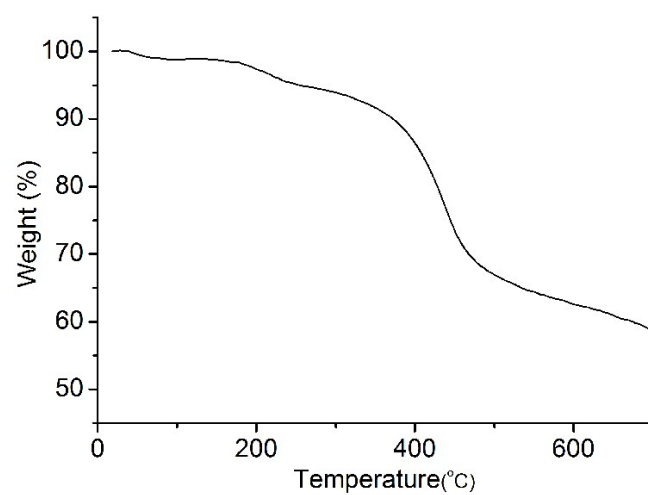

**Figure S14.** TGA analysis of MONFs-PPh<sub>3</sub>@Pd-1.

**Table S1.** Porous properties comparison of different MONFs-based and MOP-based materials.

| <b>Samples</b>                    | <b>S<sub>BET</sub><br/>[m<sup>2</sup>/g]<sup>a)</sup></b> | <b>S<sub>micro</sub> [m<sup>2</sup>/g]<br/>b)</b> | <b>S<sub>meso</sub><br/>[m<sup>2</sup>/g]<sup>c)</sup></b> | <b>V<sub>Total</sub><br/>[cm<sup>3</sup>/g]<sup>d)</sup></b> | <b>Dp<br/>[nm]<sup>e)</sup></b> |
|-----------------------------------|-----------------------------------------------------------|---------------------------------------------------|------------------------------------------------------------|--------------------------------------------------------------|---------------------------------|
| <b>MONFs-PPh<sub>3</sub>-1</b>    | 542                                                       | 179                                               | 363                                                        | 0.73                                                         | 1.27/3.17                       |
| <b>MONFs-PPh<sub>3</sub>@Pd-1</b> | 538                                                       | 136                                               | 402                                                        | 0.70                                                         | 1.17/3.17                       |
| <b>MONFs-PPh<sub>3</sub>-2</b>    | 763                                                       | 225                                               | 538                                                        | 1.21                                                         | 1.28/4.76                       |
| <b>MONFs-PPh<sub>3</sub>@Pd-2</b> | 696                                                       | 262                                               | 434                                                        | 1.07                                                         | 1.17/4.76                       |
| <b>MOP-PPh<sub>3</sub>@Pd</b>     | 486                                                       | 212                                               | 274                                                        | 0.65                                                         | 1.16/--                         |

a) BET specific surface area calculated from N<sub>2</sub> adsorption isotherm at 77.4 K; b) Microporous surface area calculated from t-plots; c) Mesoporous surface area; d) Total pore volume at P/P<sub>0</sub> = 0.998; e) Pore size calculated by density functional theory (DFT) methods (Microporous pore size/ Mesoporous pore size).



**Table S2.** Comparison of catalytic efficiency for catalytic Aryl chlorides model Suzuki-Miyaura coupling reaction with various Pd catalysts.

| Catalyst                           | Pd mol% | Base                                              | Reaction conditions                                    | Yield/%           | TOF/h <sup>-1</sup> | Ref.      |
|------------------------------------|---------|---------------------------------------------------|--------------------------------------------------------|-------------------|---------------------|-----------|
| <b>KAPs(Ph-PPh<sub>3</sub>)-Pd</b> | 0.60    | K <sub>3</sub> PO <sub>4</sub> ·3H <sub>2</sub> O | EtOH/H <sub>2</sub> O, 80°C, 3h, under N <sub>2</sub>  | 99                | 55.0                | 1         |
| <b>Pd/MPP</b>                      | 0.20    | K <sub>2</sub> CO <sub>3</sub>                    | EtOH/H <sub>2</sub> O, 80°C, 24h, in air               | <30 <sup>a)</sup> | --                  | 2         |
| <b>Poly-NHC-2-Pd<sup>2+</sup></b>  | 0.06    | --                                                | EtOH/H <sub>2</sub> O, 80°C, 3h, in air                | 100               | 585                 | 3         |
| <b>Pd/MIL-101</b>                  | 0.90    | NaOMe                                             | TBAB/H <sub>2</sub> O, 80°C, 20h, under N <sub>2</sub> | 97                | 5.40                | 4         |
| <b>MOMP 4</b>                      | 0.50    | K <sub>2</sub> CO <sub>3</sub>                    | H <sub>2</sub> O, 80°C, 10h                            | 92                | 18.4                | 5         |
| <b>Pd/POL-Ph<sub>3</sub>P</b>      | 2.00    | K <sub>2</sub> CO <sub>3</sub>                    | Toluene, 80°C, 2h                                      | 96 <sup>a)</sup>  | --                  | 6         |
| <b>MONFs-PPh<sub>3</sub>@Pd</b>    | 0.12    | K <sub>2</sub> CO <sub>3</sub>                    | EtOH/H <sub>2</sub> O, 80°C, 3h, under N <sub>2</sub>  | 99                | 275                 | This work |

a) These isolated yields were calculated based on the cross-coupling reaction between p-chloroacetophenone and phenylboronic acid.

## Analytical data for compounds of the Suzuki-Miyaura coupling reactions.

### Biphenyl

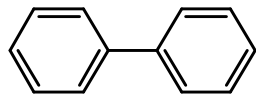

$^1\text{H NMR}$  (500 MHz,  $\text{CDCl}_3$ ):  $\delta$  7.59 (d,  $J = 7.5$  Hz, 4H); 7.45 (t,  $J = 7.5$  Hz, 4H); 7.35 (tt, 2H).

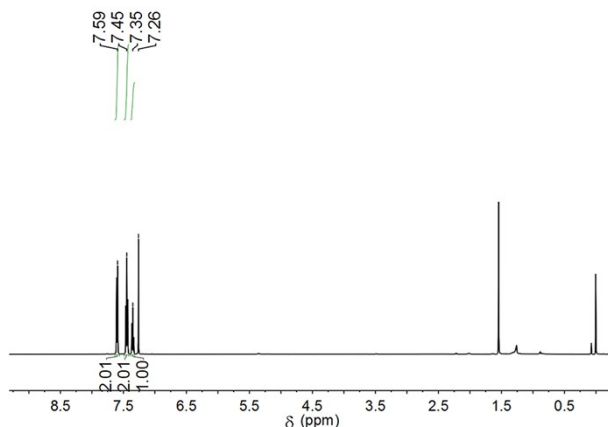

### 4-Acetylbiphenyl

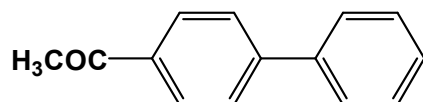

$^1\text{H NMR}$  (500 MHz,  $\text{CDCl}_3$ ):  $\delta$  8.04 (d,  $J = 8.5$  Hz, 2H);  $\delta$  7.69 (d,  $J = 8.5$  Hz, 2H);  $\delta$  7.64 (d,  $J = 8.5$  Hz, 2H);  $\delta$  7.44 (m, 3H);  $\delta$  2.64 (s, 3H).

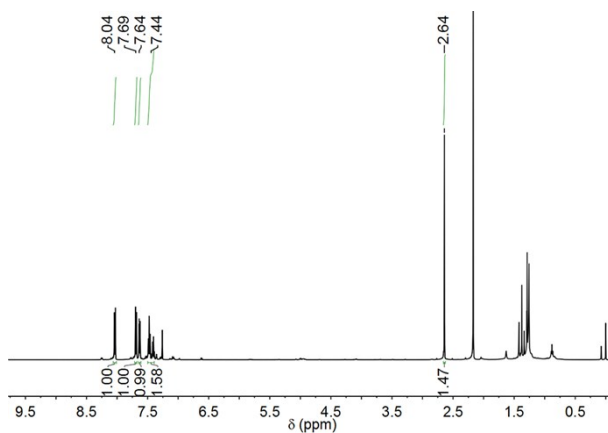

### 4-Nitrobiphenyl

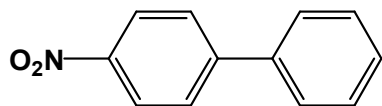

$^1\text{H NMR}$  (500 MHz,  $\text{CDCl}_3$ ):  $\delta$  8.30 (d,  $J = 8.5\text{Hz}$ , 2H);  $\delta$  7.74 (d,  $J = 8.5\text{Hz}$ , 2H);  $\delta$  7.62 (d,  $J = 7.5\text{Hz}$ , 2H);  $\delta$  7.50 (m, 3H).

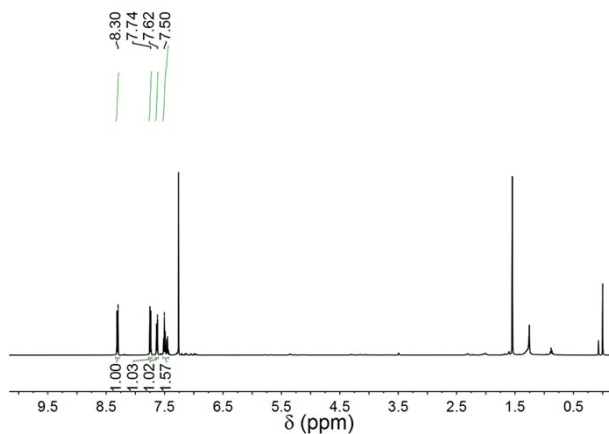

### 3-Nitro-1,1'-biphenyl

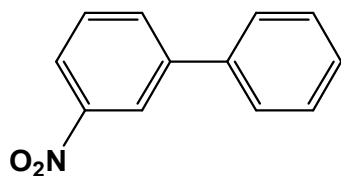

$^1\text{H NMR}$  (500 MHz,  $\text{CDCl}_3$ ):  $\delta$  8.46 (d,  $J = 2.0\text{Hz}$ , 1H);  $\delta$  8.20 (dq, 1H);  $\delta$  7.91 (dq, 1H);  $\delta$  7.62 (m, 3H);  $\delta$  7.49 (t,  $J = 8.0\text{Hz}$ , 2H);  $\delta$  7.44 (m, 1H).

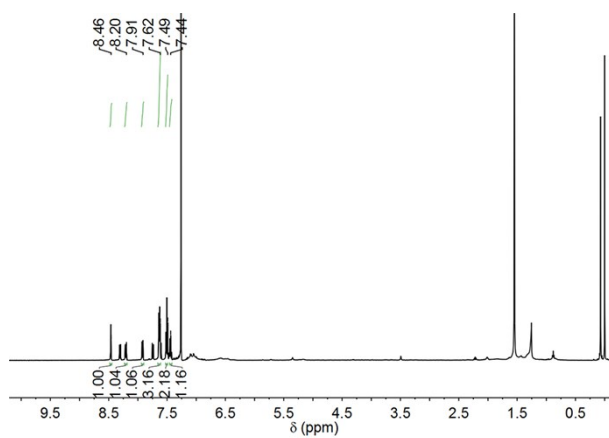

### 4-Methylbiphenyl

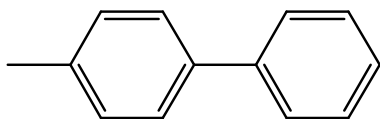

$^1\text{H NMR}$  (500 MHz,  $\text{CDCl}_3$ ):  $\delta$  7.58 (d,  $J = 8.0\text{Hz}$ , 2H);  $\delta$  7.49 (d,  $J = 8.0\text{Hz}$ , 2H);  $\delta$  7.43 (t,  $J = 7.5\text{Hz}$ , 2H);  $\delta$  7.31 (m, 1H);  $\delta$  7.25 (d,  $J = 8.0\text{Hz}$ , 2H);  $\delta$  2.39 (s, 3H).

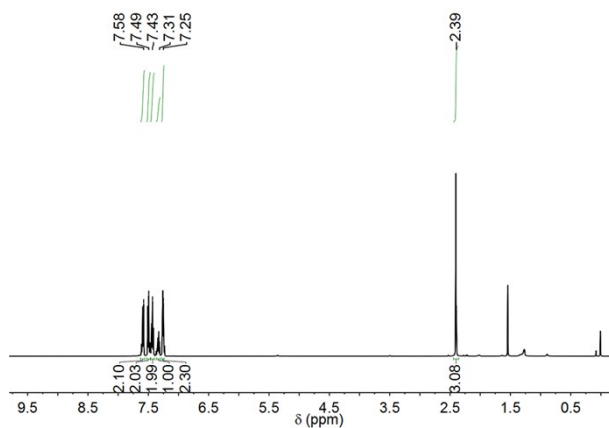

### 4-Methoxybiphenyl

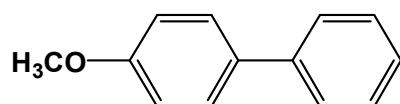

$^1\text{H NMR}$  (500 MHz,  $\text{CDCl}_3$ ):  $\delta$  7.55 (m, 4H);  $\delta$  7.42 (d,  $J = 7.5\text{Hz}$ , 2H);  $\delta$  7.31 (t,  $J = 7.5\text{ Hz}$ , 1H);  $\delta$  6.98 (d,  $J = 9.0\text{ Hz}$ , 2H);  $\delta$  3.86 (s, 3H).

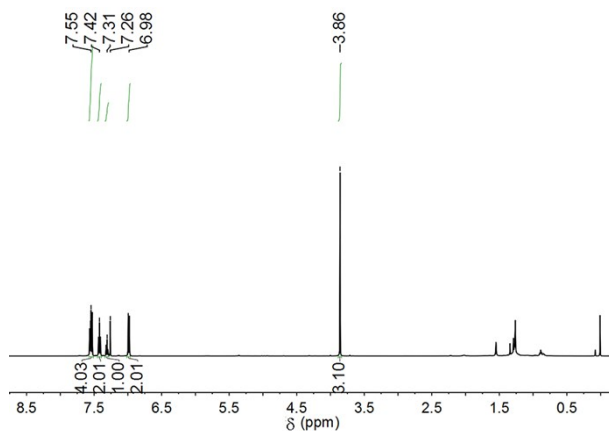

### 4-Trifluoromethylbiphenyl

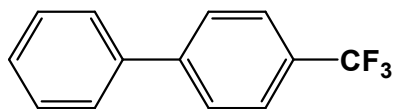

<sup>1</sup>H NMR (500 MHz, CDCl<sub>3</sub>): δ 7.70 (s, 4H); δ 7.59 (d, J = 8.0Hz, 2H); δ 7.42 (m, 3H).

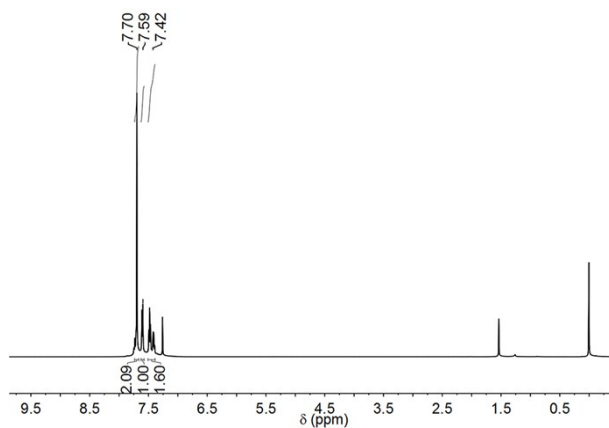

### References

1. B. Li, Z. Guan, W. Wang, X. Yang, J. Hu, B. Tan and T. Li, *Adv Mater*, 2012, **24**, 3390-3395.
2. Q. Song, Y. Jia, B. Luo, H. He and L. Zhi, *Small*, 2013, **9**, 2460-2465.
3. S. Xu, K. Song, T. Li and B. Tan, *J. Mater. Chem. A*, 2015, **3**, 1272-1278.
4. B. Yuan, Y. Pan, Y. Li, B. Yin and H. Jiang, *Angewandte Chemie International Edition*, 2010, **49**, 4054-4058.
5. C. Zhang, J.-J. Wang, Y. Liu, H. Ma, X.-L. Yang and H.-B. Xu, *Chemistry - A European Journal*, 2013, **19**, 5004-5008.
6. Y.-B. Zhou, C.-Y. Li, M. Lin, Y.-J. Ding and Z.-P. Zhan, *Advanced Synthesis & Catalysis*, 2015, **357**, 2503-2508.
